# Supplementary material
Source: PubMed Central journal article supplement (PMC7653560)
Supplement: ajtr0012-6524-f5.pdf [file ajtr0012-6524-f5.pdf]

## TIICs in MIBC

**Table S1.** Cut-off points of 22 TIIC subtypes

| TIIC subtype                              | Cut-off value |
|-------------------------------------------|---------------|
| Naive B cells                             | 0.010384      |
| Memory B cells                            | 0.003644      |
| Plasma cells                              | 0.020973      |
| CD8 <sup>+</sup> T cells                  | 0.1158        |
| Naïve CD4 <sup>+</sup> T cells.           | 0.006616      |
| Resting memory CD4 <sup>+</sup> T cells   | 0.115949      |
| Activated memory CD4 <sup>+</sup> T cells | 0.093831      |
| Follicular helper T cells                 | 0.025089      |
| Regulatory T cells (Tregs)                | 0.015243      |
| Gamma delta T cells                       | 0.052026      |
| Resting natural killer (NK) cells         | 0.045458      |
| Activated NK cells                        | 0.04404       |
| Monocytes                                 | 0.004083      |
| Macrophages M0                            | 0.12021       |
| Macrophages M1                            | 0.047876      |
| Macrophages M2                            | 0.067353      |
| Resting dendritic cells                   | 0.005379      |
| Activated dendritic cells                 | 0.11194       |
| Resting mast cells                        | 0.033443      |
| Activated mast cells                      | 0.037974      |
| Eosinophils                               | 0             |
| Neutrophils                               | 0.025106      |

# TIICs in MIBC

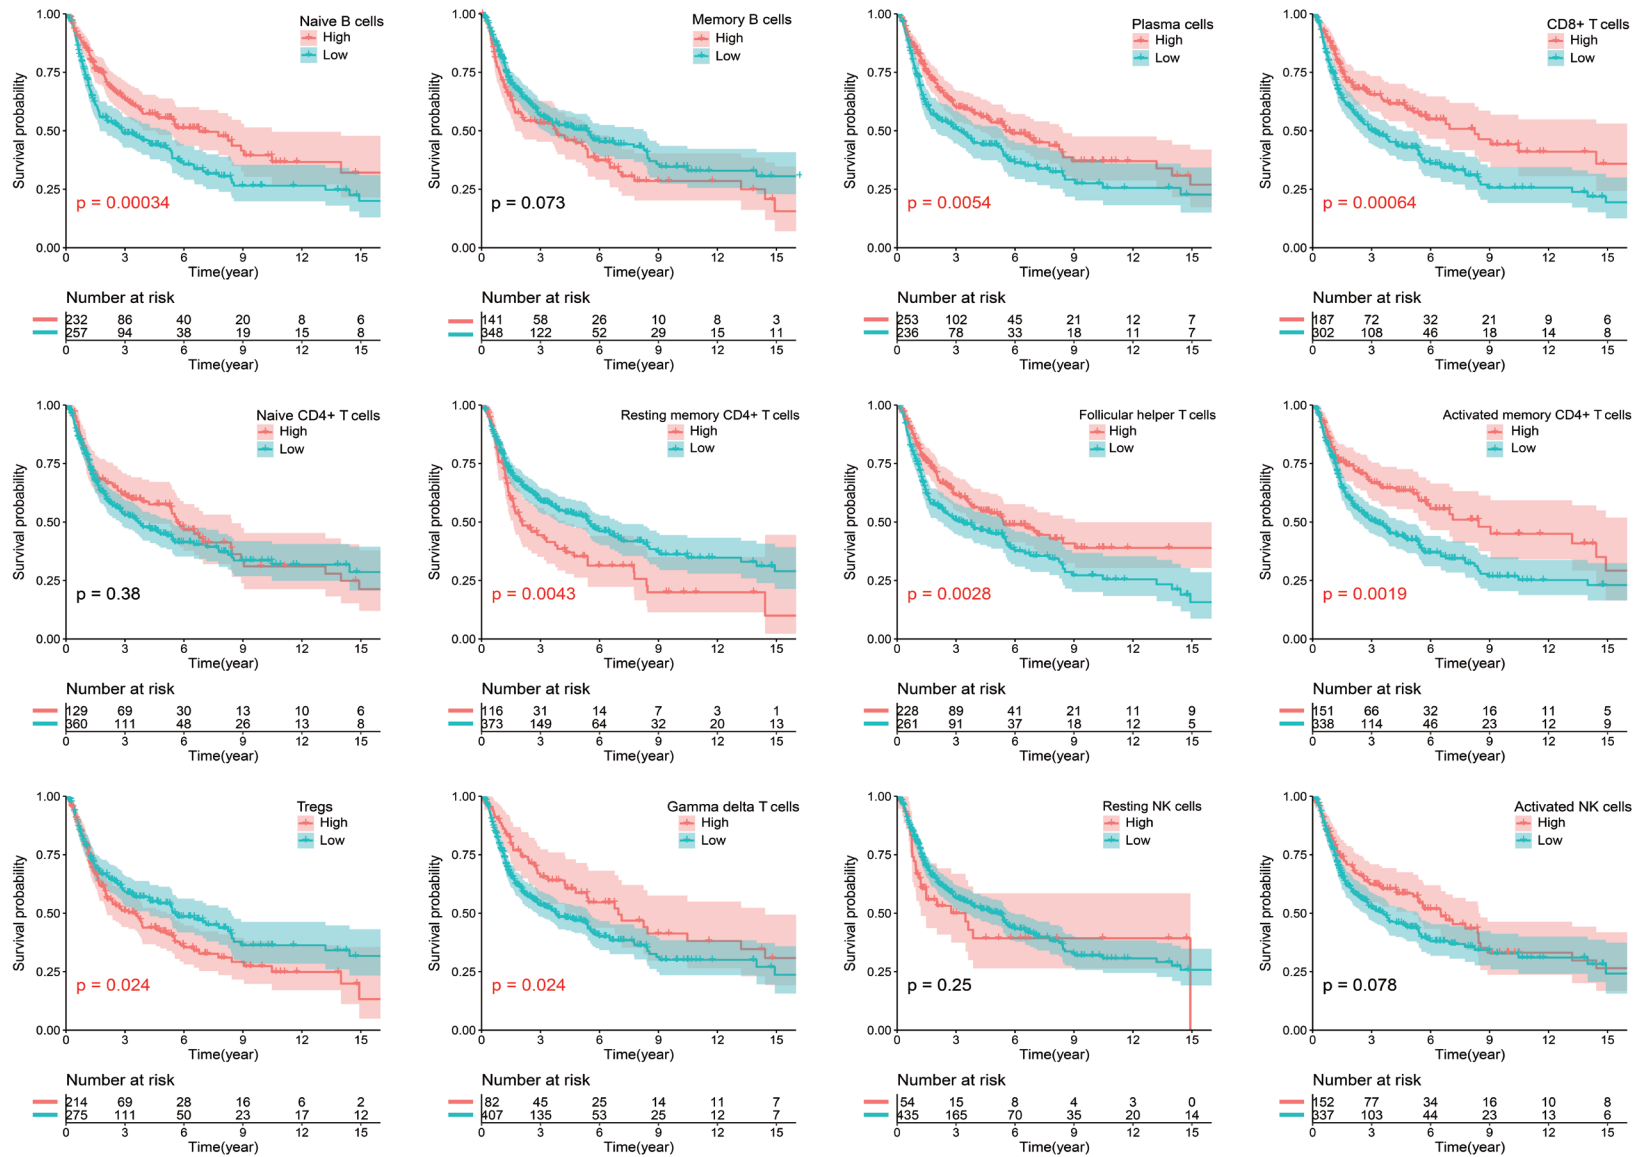

## TIICs in MIBC

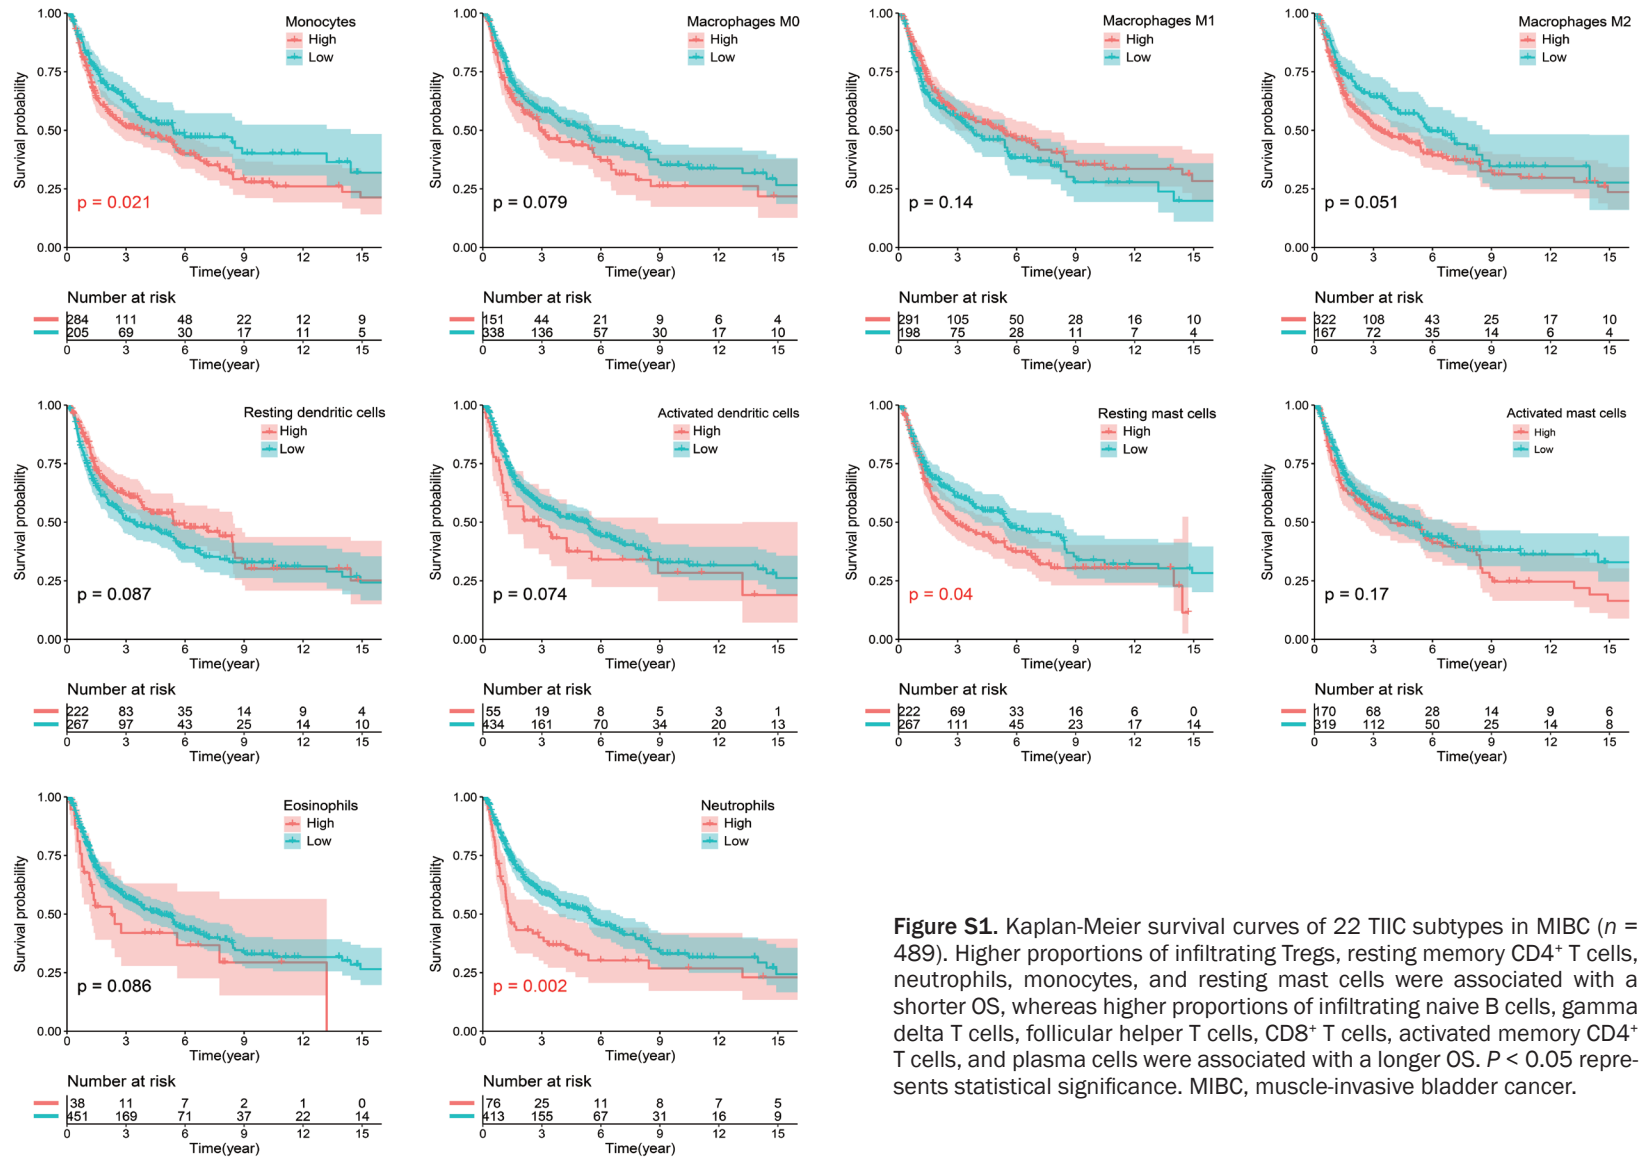

**Figure S1.** Kaplan-Meier survival curves of 22 TIIC subtypes in MIBC ( $n = 489$ ). Higher proportions of infiltrating Tregs, resting memory CD4<sup>+</sup> T cells, neutrophils, monocytes, and resting mast cells were associated with a shorter OS, whereas higher proportions of infiltrating naive B cells, gamma delta T cells, follicular helper T cells, CD8<sup>+</sup> T cells, activated memory CD4<sup>+</sup> T cells, and plasma cells were associated with a longer OS.  $P < 0.05$  represents statistical significance. MIBC, muscle-invasive bladder cancer.

## TIICs in MIBC

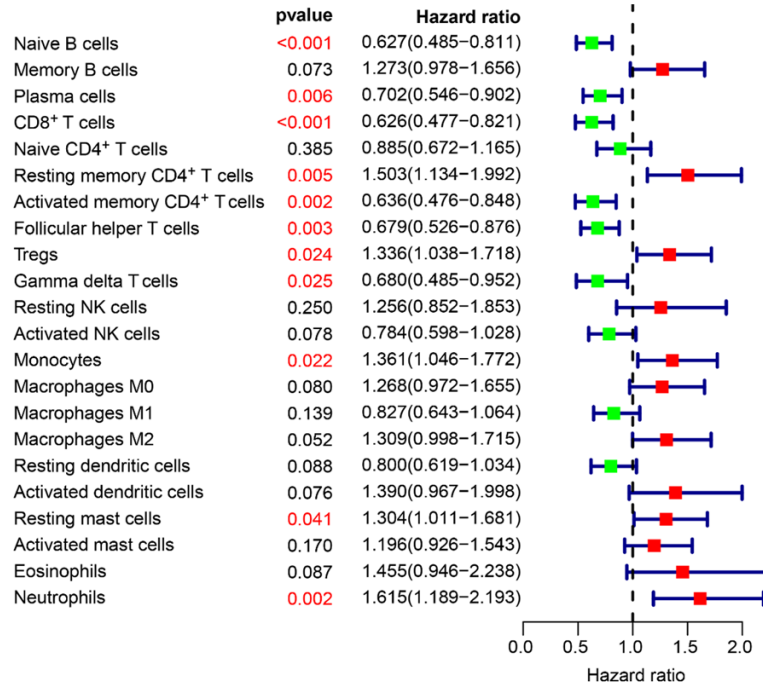

**Figure S2.** Forest plots showing the associations between 22 TIIC types and OS in 489 MIBC patients. Unadjusted HRs are shown with 95% CIs.  $P < 0.05$  represents statistical significance. MIBC, muscle-invasive bladder cancer. TIICs, tumor-infiltrating immune cells. OS, overall survival.

## TIICs in MIBC

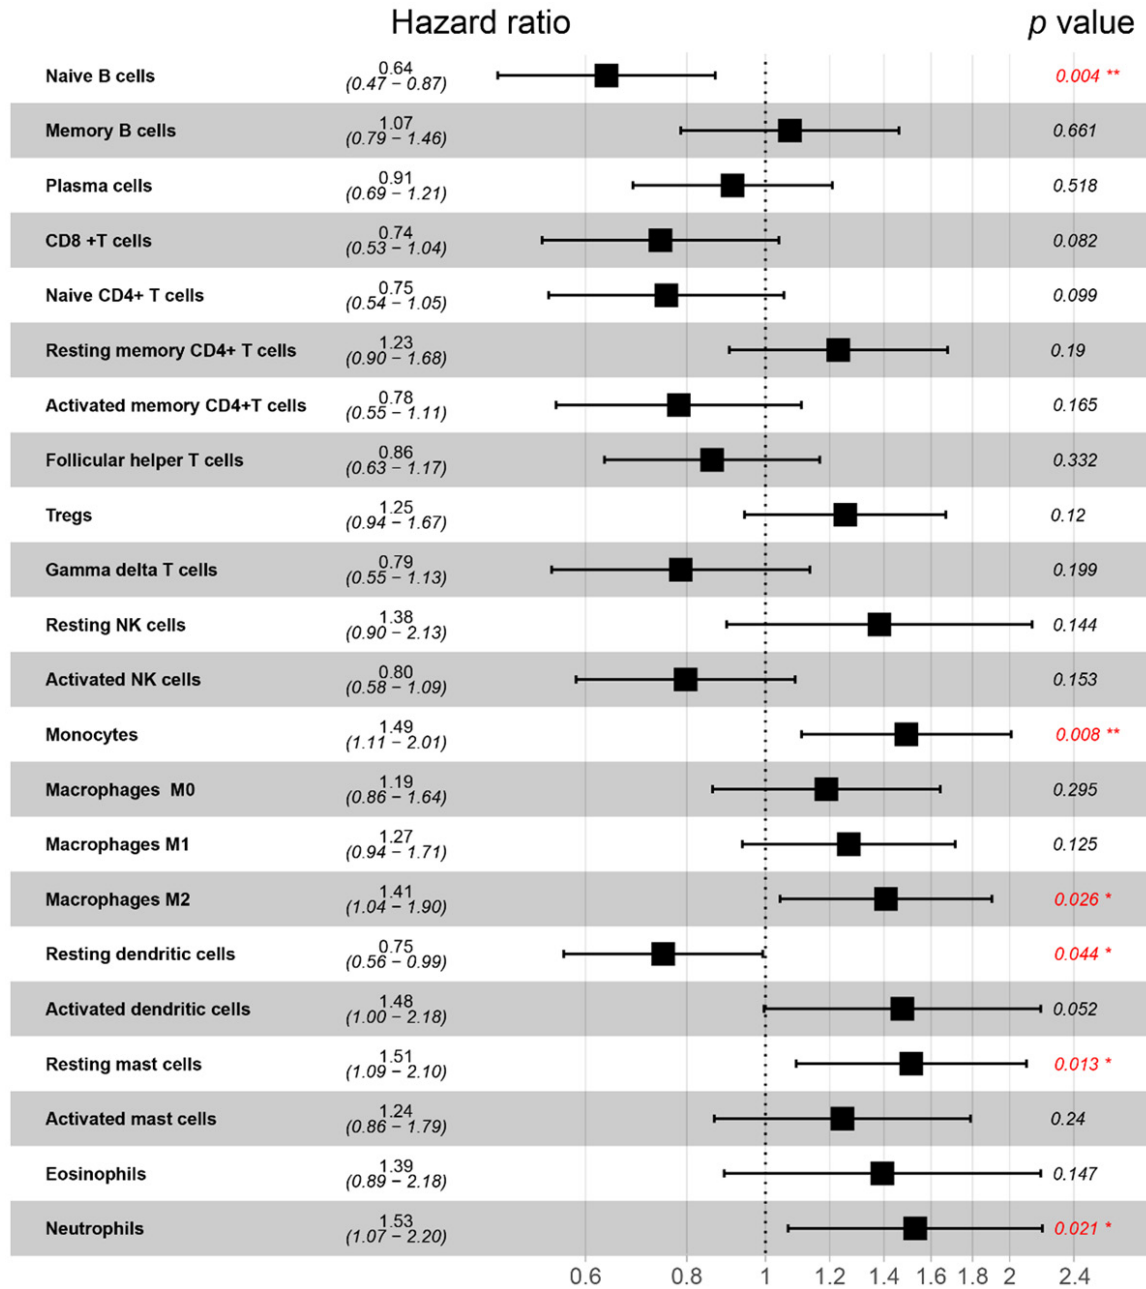

**Figure S3.** Multivariate Cox regression analysis of 22 TIIC subtypes and OS in 489 patients. Monocytes, M2 macrophages, resting mast cells, and neutrophils were independent risk factors for OS, whereas naive B cells and resting dendritic cells were independent predictors for OS in MIBC patients. Unadjusted HRs are shown with 95% CIs.  $P < 0.05$  represents statistical significance. MIBC, muscle-invasive bladder cancer. TIICs, tumor-infiltrating immune cells. OS, overall survival.

### TIICs in MIBC

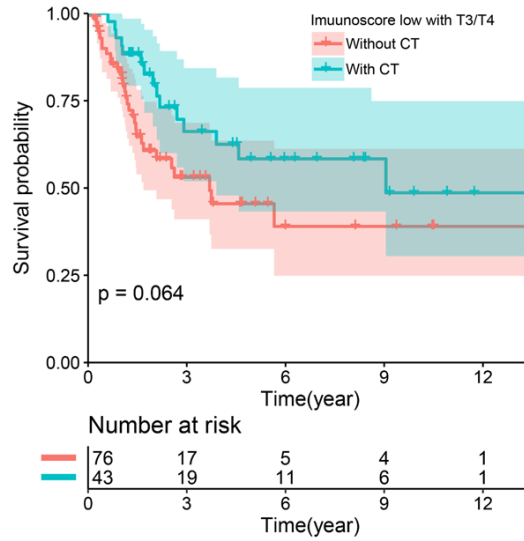

**Figure S4.** For the patients with low immunoscores and T3/T4 stage disease, no significant difference in OS was found irrespective of chemotherapy use ( $P > 0.05$ ). OS, overall survival. CT, chemotherapy.

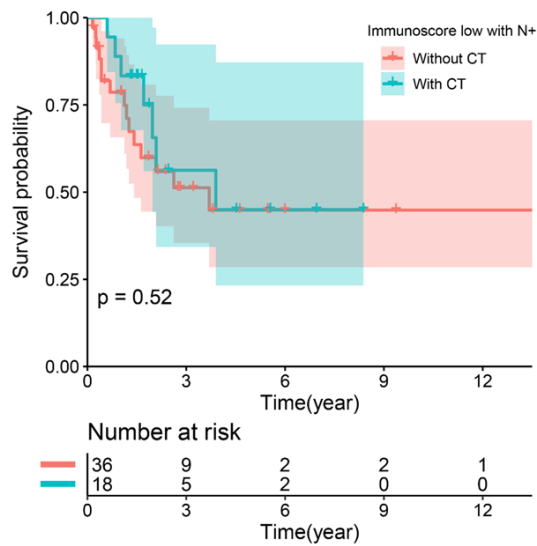

**Figure S5.** For the patients with low immunoscores and regional lymph node metastasis, no significant difference in OS was found irrespective of chemotherapy use ( $P > 0.05$ ). OS, overall survival. CT, chemotherapy.
